# Supplementary material
Source: publisher figshare collection journal article supplement (https://acs.figshare.com/ndownloader/files/9472498)
Supplement: Supplementary file 1 [file 9472498]

## *Supporting Information*

### **Effects of High Pressure on Phospholipid Bilayers**

Wei Ding,<sup>†</sup> Michail Palaiokostas,<sup>†</sup> Ganesh Shahane,<sup>†</sup> Wen Wang,<sup>†</sup> and Mario Orsi<sup>\*,‡</sup>

<sup>†</sup>*School of Engineering & Materials Science, Queen Mary University of London  
Mile End Road, London E1 4NS, UK*

<sup>‡</sup>*Department of Applied Sciences, University of the West of England  
Coldharbour Lane, Bristol BS16 1QY, UK*

E-mail: Mario.Orsi@uwe.ac.uk

#### **Electron density profiles**

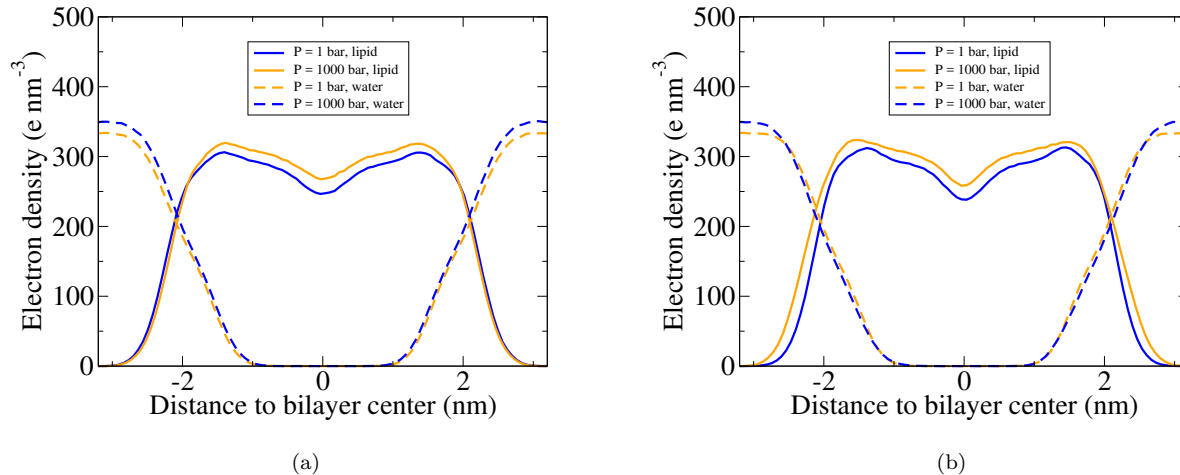

Figure S1: Electron density of the individual water and lipid components for (a) DOPC and (b) POPC bilayers at 1 bar (blue) and 1000 bar (orange).

### Headgroup orientation

We calculated the angle between the lipid head P-N vector and the z-axis (i.e. the bilayer normal). For DOPC, the angle is  $69.53 \pm 0.20$  degrees at 1 bar and  $69.24 \pm 0.23$  degrees at 1000 bar, while for POPC it is  $69.38 \pm 0.22$  degrees at 1 bar and  $69.54 \pm 0.22$  degrees at 1000 bar. Statistically, the differences for both pairs are not significant ( $p > 0.05$ ). Incidentally, the absence of a significant effect on the headgroup orientation is consistent with the results obtained for the dipole potential, when one considers that the P-N vector is the main contributor (in terms of magnitude) to the overall dipole potential.

### Hydrogen bonds

The table below reports the average number of hydrogen bonds per lipid formed between lipid head groups and water molecules (“Head-Water”), and between lipid head groups themselves (“Head-Head”):

| Number<br>of H bonds | DOPC            |                 | POPC            |                 |
|----------------------|-----------------|-----------------|-----------------|-----------------|
|                      | 1 bar           | 1000 bar        | 1 bar           | 1000 bar        |
| Head-Water           | $6.87 \pm 0.04$ | $6.91 \pm 0.03$ | $6.60 \pm 0.03$ | $6.66 \pm 0.03$ |
| Head-Head            | $0.34 \pm 0.02$ | $0.34 \pm 0.01$ | $0.38 \pm 0.01$ | $0.39 \pm 0.01$ |
